# Supplementary figures and images for: A Mycobacterium tuberculosis Cytochrome bd Oxidase Mutant Is Hypersensitive to Bedaquiline
Source: PubMed Central journal article supplement — mBio. 2014 Jul 15;5(4):e01275-14. doi: 10.1128/mBio.01275-14 (PMC4161257; doi:10.1128/mbio.01275-14), 2014-07-15

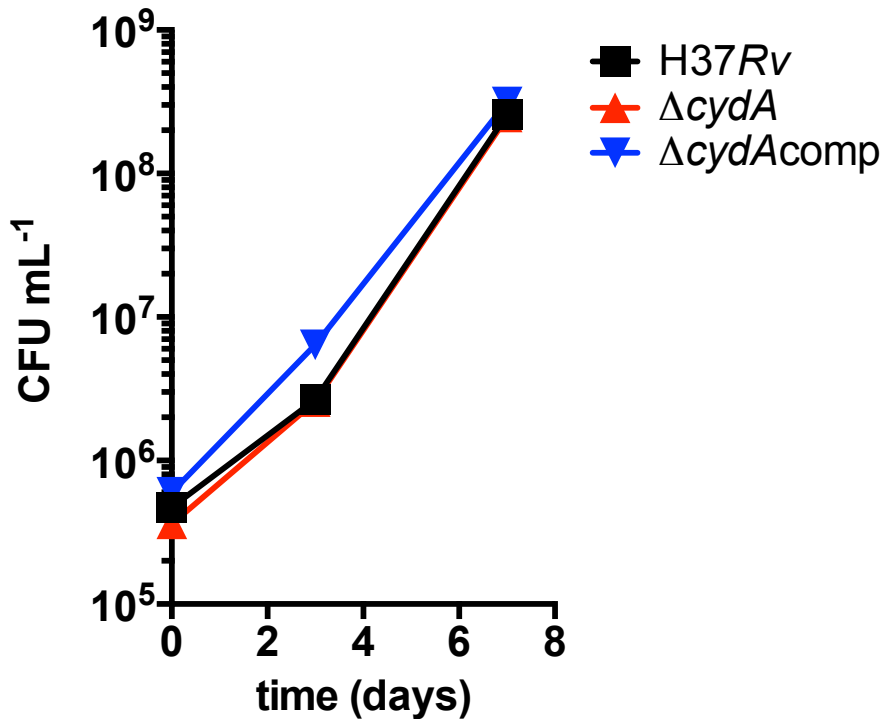

Supplement: mbo004141908sf01.pdf [file mbo004141908sf01.pdf]
